# Supplementary material for: Enhanced Pharmaceutically Active Compounds Productivity from Streptomyces SUK 25: Optimization, Characterization, Mechanism and Techno-Economic Analysis
Source: MDPI journal article supplement (doi:10.3390/molecules26092510), 2021-04-25
Supplement: s1 [file s1]

## Supplementary data

### Article

Enhanced pharmaceutically active compounds productivity from *Streptomyces* SUK 25; optimization; characterization, mechanism, and techno-economic analysis

Muhanna M. Al-Shaibani <sup>1,2</sup>, Radin Maya Saphira Radin Mohamed <sup>1,\*</sup>, Noraziah M. Zin <sup>2,\*</sup>, Adel Al-Gheethi <sup>1,\*</sup>,  
Mohammed Al-Sahari <sup>1</sup> and Hesham Ali El Enshasy <sup>3,4</sup>

**Table S1:**

The central composite design arrangement and responses for pharmaceutically active compounds production from *Streptomyces* SUK 25

| Run | $x_1$ | $x_2$ | $x_3$ | $x_4$ | $x_5$ | $x_6$ | $x_7$ | $y_1$  |           | $y_2$  |           | $y_3$  |           |
|-----|-------|-------|-------|-------|-------|-------|-------|--------|-----------|--------|-----------|--------|-----------|
|     |       |       |       |       |       |       |       | Actual | Predicted | Actual | Predicted | Actual | Predicted |
| 1   | 0     | 7     | 28    | 140   | 1     | 3     | 0.5   | 0.0000 | 0.4613    | 0.0000 | 28.04     | 2.00   | 3.68      |
| 2   | 3     | 7     | 28    | 140   | 1     | 3     | 0.5   | 3.83   | 3.34      | 64.00  | 20.49     | 11.40  | 9.08      |
| 3   | 6     | 7     | 28    | 140   | 1     | 3     | 0.5   | 5.70   | 5.49      | 16.00  | 14.32     | 13.20  | 13.29     |
| 4   | 9     | 7     | 28    | 140   | 1     | 3     | 0.5   | 7.00   | 6.93      | 8.00   | 9.53      | 17.70  | 16.33     |
| 5   | 12    | 7     | 28    | 140   | 1     | 3     | 0.5   | 8.70   | 7.64      | 4.00   | 6.13      | 19.60  | 18.18     |
| 6   | 15    | 7     | 28    | 140   | 1     | 3     | 0.5   | 7.50   | 7.63      | 4.00   | 4.11      | 18.90  | 18.85     |
| 7   | 18    | 7     | 28    | 140   | 1     | 3     | 0.5   | 6.20   | 6.90      | 8.00   | 3.48      | 17.90  | 18.34     |
| 8   | 21    | 7     | 28    | 140   | 1     | 3     | 0.5   | 6.00   | 5.45      | 8.00   | 4.24      | 17.40  | 16.65     |
| 9   | 12    | 4     | 28    | 140   | 1     | 3     | 0.5   | 3.40   | 2.77      | 8.00   | 8.29      | 12.90  | 11.55     |
| 10  | 12    | 5     | 28    | 140   | 1     | 3     | 0.5   | 4.30   | 4.79      | 8.00   | 7.57      | 12.90  | 14.30     |
| 11  | 12    | 6     | 28    | 140   | 1     | 3     | 0.5   | 4.30   | 6.41      | 8.00   | 6.85      | 12.90  | 16.51     |
| 12  | 12    | 7     | 28    | 140   | 1     | 3     | 0.5   | 8.70   | 7.64      | 4.00   | 6.13      | 19.60  | 18.18     |
| 13  | 12    | 8     | 28    | 140   | 1     | 3     | 0.5   | 7.70   | 8.47      | 8.00   | 5.42      | 17.60  | 19.31     |
| 14  | 12    | 9     | 28    | 140   | 1     | 3     | 0.5   | 8.70   | 8.91      | 4.00   | 4.71      | 19.60  | 19.91     |
| 15  | 12    | 7     | 26    | 140   | 1     | 3     | 0.5   | 5.74   | 6.09      | 16.00  | 22.71     | 15.60  | 16.03     |
| 16  | 12    | 7     | 28    | 140   | 1     | 3     | 0.5   | 8.70   | 7.64      | 4.00   | 6.13      | 19.60  | 18.18     |
| 17  | 12    | 7     | 30    | 140   | 1     | 3     | 0.5   | 7.70   | 8.23      | 8.00   | 6.27      | 17.60  | 18.64     |
| 18  | 12    | 7     | 32    | 140   | 1     | 3     | 0.5   | 7.70   | 7.86      | 8.00   | 23.14     | 17.60  | 17.42     |
| 19  | 12    | 7     | 34    | 140   | 1     | 3     | 0.5   | 6.70   | 6.53      | 64.00  | 56.72     | 14.60  | 14.52     |
| 20  | 12    | 7     | 28    | 120   | 1     | 3     | 0.5   | 8.20   | 8.58      | 8.00   | 10.40     | 17.60  | 18.03     |
| 21  | 12    | 7     | 28    | 140   | 1     | 3     | 0.5   | 8.70   | 7.64      | 4.00   | 6.13      | 19.60  | 18.18     |

|    |    |   |    |     |     |     |     |      |      |       |       |       |       |
|----|----|---|----|-----|-----|-----|-----|------|------|-------|-------|-------|-------|
| 22 | 12 | 7 | 28 | 160 | 1   | 3   | 0.5 | 5.74 | 6.88 | 16.00 | 23.20 | 15.60 | 16.89 |
| 23 | 12 | 7 | 28 | 180 | 1   | 3   | 0.5 | 6.70 | 6.32 | 64.00 | 61.60 | 14.60 | 14.17 |
| 24 | 12 | 7 | 28 | 140 | 1   | 3   | 0.5 | 8.70 | 7.64 | 4.00  | 6.13  | 19.60 | 18.18 |
| 25 | 12 | 7 | 28 | 140 | 1.5 | 3   | 0.5 | 4.30 | 6.42 | 8.00  | 0.23  | 12.90 | 16.45 |
| 26 | 12 | 7 | 28 | 140 | 2   | 3   | 0.5 | 7.70 | 5.89 | 8.00  | 6.48  | 17.60 | 15.39 |
| 27 | 12 | 7 | 28 | 140 | 2.5 | 3   | 0.5 | 5.74 | 6.03 | 6.00  | 26.26 | 15.60 | 15.00 |
| 28 | 12 | 7 | 28 | 140 | 3   | 3   | 0.5 | 6.70 | 6.86 | 64.00 | 59.12 | 14.60 | 15.27 |
| 29 | 12 | 7 | 28 | 140 | 1   | 1   | 0.5 | 6.70 | 7.44 | 64.00 | 32.94 | 14.60 | 16.91 |
| 30 | 12 | 7 | 28 | 140 | 1   | 1.5 | 0.5 | 5.74 | 6.21 | 16.00 | 18.18 | 15.60 | 15.50 |
| 31 | 12 | 7 | 28 | 140 | 1   | 2   | 0.5 | 7.70 | 5.84 | 8.00  | 8.79  | 17.60 | 15.24 |
| 32 | 12 | 7 | 28 | 140 | 1   | 2.5 | 0.5 | 4.30 | 6.31 | 8.00  | 4.77  | 12.90 | 16.14 |
| 33 | 12 | 7 | 28 | 140 | 1   | 3   | 0.5 | 8.70 | 7.64 | 4.00  | 6.13  | 19.60 | 18.18 |
| 34 | 12 | 7 | 28 | 140 | 1   | 1   | 0.5 | 8.70 | 7.44 | 4.00  | 32.94 | 19.60 | 16.91 |
| 35 | 12 | 7 | 28 | 140 | 1   | 1   | 1   | 4.30 | 6.09 | 8.00  | 10.68 | 12.90 | 15.33 |
| 36 | 12 | 7 | 28 | 140 | 1   | 1   | 1.5 | 7.70 | 5.91 | 8.00  | 5.32  | 17.60 | 15.17 |
| 37 | 12 | 7 | 28 | 140 | 1   | 1   | 2   | 6.30 | 6.90 | 16.00 | 16.89 | 15.60 | 16.41 |

$x_1$  (Time) (Day),  $x_2$  (pH),  $x_3$  (Temperature) ( $^{\circ}$ C),  $x_4$  (Speed) (rpm),  $x_5$  (Glucose) (g/L),  $x_6$  (Mannitol) (g/L),  $x_7$  (Asparagine) (g/L),  $y_1$ (Crude extracts) (mg/L),  $y_2$ MIC) ( $\mu$ g/mL),  $y_3$ IZ) (mm).

**Table S2** The regression coefficient and their significance of the quadratic model for pharmaceutically active compounds production from *Streptomyces* SUK 25

| Term    | Coefficient |         |         | Standard Error |       |        | F value |           |        | P-value |        |         |
|---------|-------------|---------|---------|----------------|-------|--------|---------|-----------|--------|---------|--------|---------|
|         | $y_1$       | $y_2$   | $y_3$   | $y_1$          | $y_2$ | $y_3$  | $y_1$   | $y_2$     | $y_3$  | $y_1$   | $y_2$  | $y_3$   |
| Model   | 1.86        | 10.03   | 9.07    | 2.17           | 24.63 | 3.52   | 3.80    | 2.70      | 4.83   | 0.0026  | 0.0180 | 0.0005  |
| $x_1$   | 2.49        | 11.90   | 6.48    | 0.7262         | 8.22  | 1.17   | 11.79   | 2.09      | 30.50  | 0.0024  | 0.1619 | <0.0001 |
| $x_2$   | 3.07        | 1.79    | 4.18    | 0.7975         | 9.03  | 1.29   | 14.82   | 0.0392    | 10.53  | 0.0009  | 0.8448 | 0.0037  |
| $x_3$   | 0.2232      | -17.01  | -0.7574 | 0.7601         | 8.61  | 1.23   | 0.0862  | 3.90      | 0.3801 | 0.7718  | 0.0608 | 0.5439  |
| $x_4$   | -1.13       | -25.60  | -1.93   | 0.8728         | 9.88  | 1.41   | 1.68    | 6.71      | 1.87   | 0.2084  | 0.0167 | 0.1850  |
| $x_5$   | -0.3909     | -26.50  | -1.45   | 0.6570         | 7.44  | 1.06   | 0.3540  | 12.69     | 1.87   | 0.5579  | 0.0017 | 0.1847  |
| $x_6$   | 0.0994      | 13.41   | 0.6318  | 0.4911         | 5.56  | 0.7938 | 0.0409  | 5.81      | 0.6334 | 0.8415  | 0.0247 | 0.4346  |
| $x_7$   | -0.2710     | 8.03    | -0.2516 | 0.7894         | 8.94  | 1.28   | 0.1179  | 0.8063    | 0.0389 | 0.7346  | 0.3789 | 0.8455  |
| $x_1^2$ | -4.42       | -8.48   | -7.23   | 1.00           | 11.36 | 1.62   | 19.37   | 0.5570    | 19.88  | 0.0002  | 0.4634 | 0.0002  |
| $x_2^2$ | -1.23       | -0.0156 | -1.68   | 1.07           | 12.09 | 1.73   | 1.33    | 1.668E-06 | 0.9445 | 0.2607  | 0.9990 | 0.3417  |
| $x_3^2$ | -1.92       | -33.44  | -3.37   | 1.33           | 15.10 | 2.16   | 2.07    | 4.90      | 2.44   | 0.1638  | 0.0375 | 0.1325  |
| $x_4^2$ | 0.2132      | -24.00  | -1.61   | 1.19           | 13.47 | 1.92   | 0.0321  | 3.17      | 0.7045 | 0.8594  | 0.0886 | 0.4103  |
| $x_5^2$ | 1.36        | -26.15  | 1.33    | 1.22           | 13.78 | 1.97   | 1.25    | 3.60      | 0.4602 | 0.2763  | 0.0709 | 0.5046  |
| $x_6^2$ | 1.70        | -10.75  | 2.30    | 1.10           | 12.45 | 1.78   | 2.40    | 0.7460    | 1.68   | 0.1359  | 0.3971 | 0.2086  |
| $x_7^2$ | 1.31        | -19.03  | 1.59    | 1.42           | 16.04 | 2.29   | 0.8601  | 1.41      | 0.4819 | 0.3638  | 0.2481 | 0.4948  |

$x_1$  (Time) (Day),  $x_2$  (pH),  $x_3$  (Temperature) (°C),  $x_4$  (Speed) (rpm),  $x_5$  (Glucose) (g/L),  $x_6$  (Mannitol) (g/L),  $x_7$  (Asparagine) (g/L),  $y_1$  (Crude extracts) (mg/L),  $y_2$  MIC (µg/mL),  $y_3$  (IZ) (mm).

**Table S3 :** Peaks absorbance values of FT-IR spectra of PHACs

| Frequency Wave<br>number cm <sup>-1</sup> | Assignment                                                                                                                 |
|-------------------------------------------|----------------------------------------------------------------------------------------------------------------------------|
| 3345                                      | N-H and O-H stretching                                                                                                     |
| 3257                                      | N-H and O-H stretching                                                                                                     |
| 3083                                      |                                                                                                                            |
| 2901                                      | Aromatic C-H stretching                                                                                                    |
| 1684                                      | Phenyl group                                                                                                               |
| 1562                                      | N-O stretch (ArNO <sub>2</sub> ) & C-C stretching vibrations                                                               |
| 1412                                      | C-H deformations & C-C stretching vibrations                                                                               |
| 1343                                      |                                                                                                                            |
| 1245                                      | O-H bending                                                                                                                |
| 1062                                      | C-O stretch (Primary alcohol)                                                                                              |
| 974                                       | C-N stretch- C - Chlorine                                                                                                  |
| 815                                       | Meta di substituted aromatic ring ortho-di substituted aromatic ring<br>due to -H, moving out of plane of the benzene ring |
| 652                                       | C- chlorine bonds                                                                                                          |

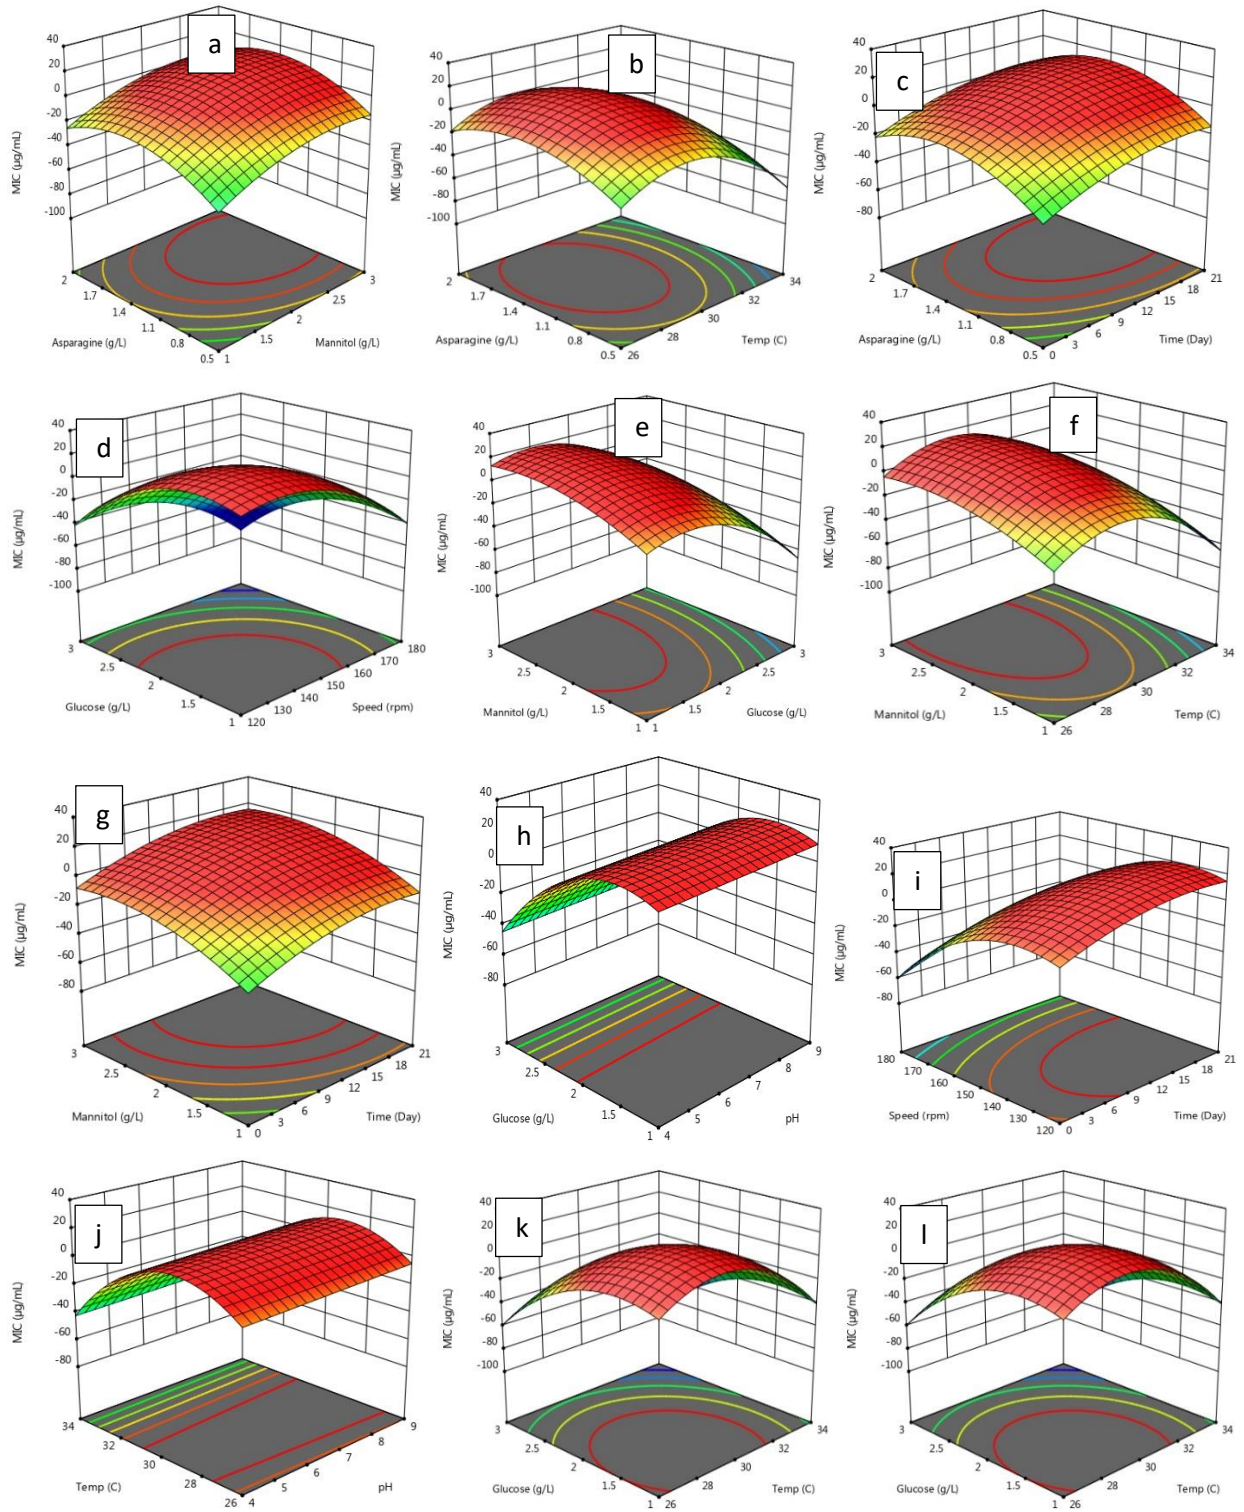

**Figure S1.** Three-dimensional response surface plot for interactions between  $x_1$  (time) (day),  $x_2$  (pH),  $x_3$  (temperature) (°C),  $x_4$  (speed) (rpm),  $x_5$  (glucose) (g/L),  $x_6$  (mannitol) (g/L),  $x_7$  (asparagine) (g/L) and their effects on  $y_2$  (MIC) (μg/mL).

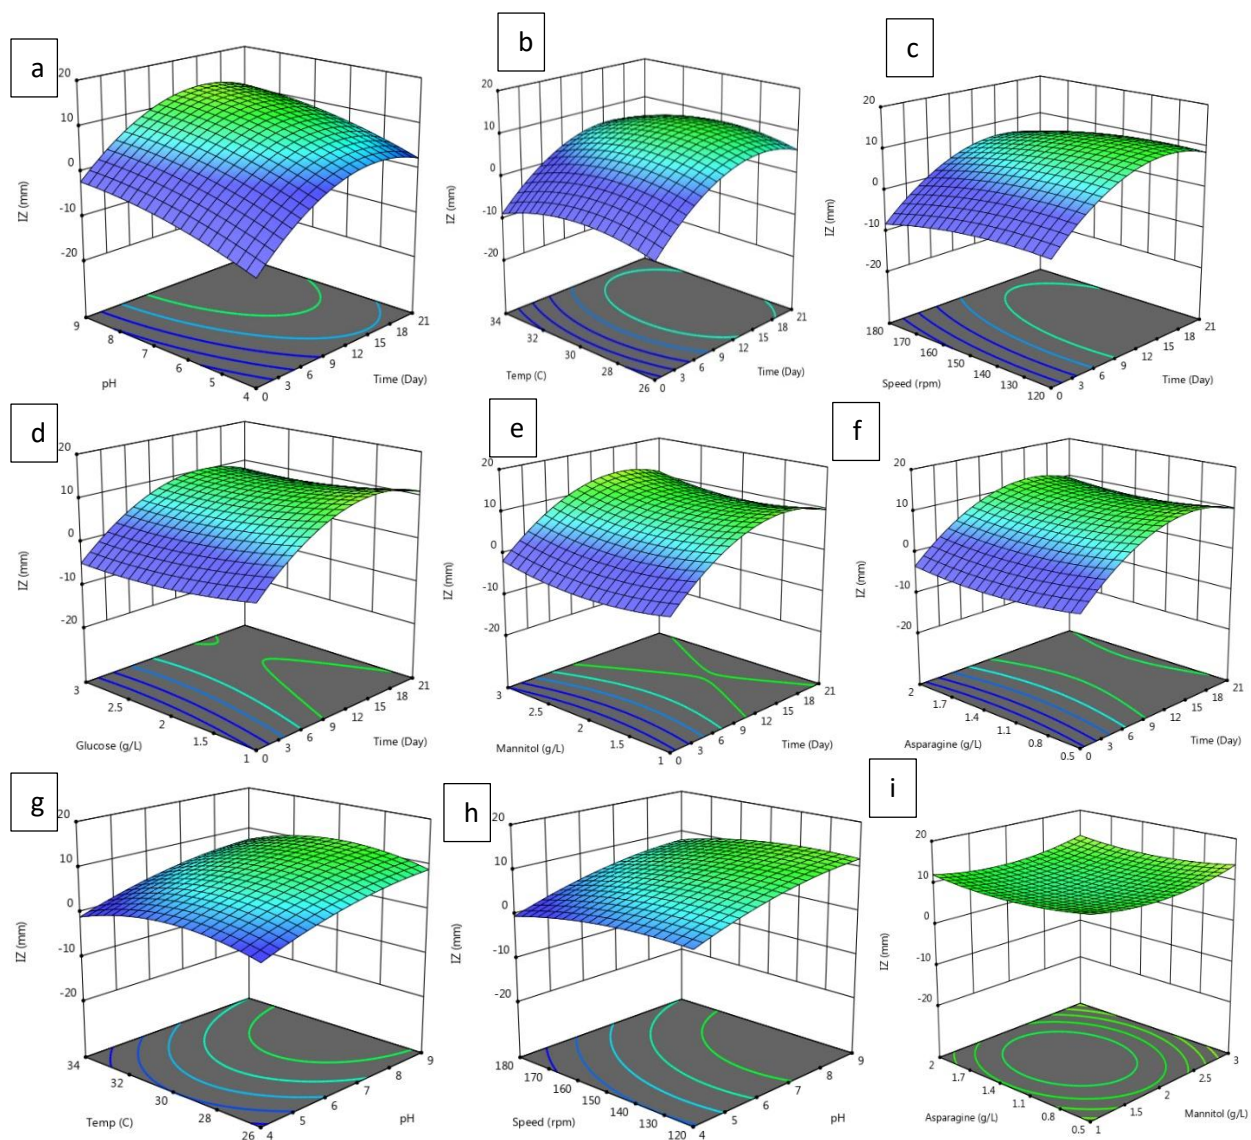

**Figure S2:** Three-dimensional response surface plot for interactions between  $x_1$  (time) (day),  $x_2$  (pH),  $x_3$  (temperature) (°C),  $x_4$  (speed) (rpm),  $x_5$  (glucose) (g/L),  $x_6$  (mannitol) (g/L),  $x_7$  (asparagine) (g/L) and their effects on  $y_3$  IZ (mm).
